# Supplementary material
Source: Royal Society of Chemistry journal article supplement (doi:10.1039/d6ta01090c)
Supplement: d6ta01090c1.pdf [file d6ta01090c1.pdf]

**Supporting Information for**

**Oxygen-Bridged Fe-Ni Heterointerfaces Confined in Hierarchical**

**Mo<sub>x</sub>C/N-Doped Carbon Enable Bifunctional Pathway for Efficient**

**Oxygen Evolution**

Cheol Ju Kim<sup>a+</sup>, Seungjoon Ha<sup>b+</sup>, Yun Jae Lee<sup>a</sup>, Yun Min Kim<sup>c</sup>, Hyun Jin Kim<sup>a</sup>, Haeseong Jang<sup>a,c</sup>, Seunghwa Lee<sup>\*b</sup>, and Seung-Keun Park<sup>\*a,c</sup>

<sup>a</sup> *Department of Intelligent Energy and Industry, Chung-Ang University, 84 Heukseok-ro, Dongjak-gu, Seoul 06974, Republic of Korea*

<sup>b</sup> *Department of Chemical Engineering, Changwon National University, Changwon, 51140, Republic of Korea*

<sup>c</sup> *Department of Advanced Materials Engineering, Chung-Ang University, 4726, Seodong-daero, Daedeok-myeon, Anseong-si, Gyeonggi-do 17546, Republic of Korea*

+These authors contributed equally to this work

\*Corresponding author.

E-mail address: seunghwa@changwon.ac.kr (S. Lee) skpark09@cau.ac.kr (S. -K. Park)

## **Characterizations of Materials**

Scanning electron microscopy (SEM, HITACHI S-5000) and field-emission transmission electron microscopy (FE-TEM, JEM-2100F, Korea Basic Institute (Daegu)) were used to determine the morphology and architecture of the fabricated specimens. Powder X-ray diffraction (XRD) utilizing Cu K $\alpha$  radiation ( $\lambda = 1.54060 \text{ \AA}$ ) was conducted to validate their crystallographic phases. The chemical compositions of the samples were analyzed using X-ray photoelectron spectroscopy (XPS). Elemental analysis was conducted using inductively coupled plasma-optical emission spectrometry (ICP-OES; Optima 4300 DV). XANES spectra and EXAFS spectra were measured using the BL10C beamline at the Pohang Light Source (PLS-II) in Korea.

## **Raman spectroscopy**

The catalyst ink was prepared by dispersing 10 mg of the catalyst in a mixed solvent consisting of 450  $\mu\text{L}$  of deionized water, 450  $\mu\text{L}$  of isopropanol, and 100  $\mu\text{L}$  of Nafion solution. The mixture was sonicated for 30 minutes to achieve a homogeneous ink. Afterward, 10  $\mu\text{L}$  of the ink was drop-cast onto a gold (Au) foil, achieving a catalyst loading of approximately 0.2 mg  $\text{cm}^{-2}$ . The coated electrode was then dried at 70  $^{\circ}\text{C}$  for 30 minutes.

Operando Raman spectroscopy was conducted using a three-electrode configuration, where the catalyst-deposited Au foil served as the working electrode, a platinum wire served as the counter electrode, and a double-junction Ag/AgCl (3 M KCl) electrode was used as the reference electrode. The electrolyte employed was a 1 M KOH aqueous solution. Operando Raman spectra were recorded at open-circuit potential (OCP) and at various applied potentials ranging from 1.2 V to 1.6 V versus the reversible hydrogen electrode (RHE) in 0.05 V increases. The experiments were performed using a handmade Teflon cell at room temperature. The Raman spectrometer was equipped with a 532 nm laser, a 60 $\times$  water-immersion objective,

and an 1800  $\text{mm}^{-1}$  grating. For each spectrum, 30 scans were collected with an acquisition time of 1 second per scan. To ensure the reliability of the spectra, peak calibration was conducted using standard acetaminophen peaks prior to the measurements.

### Electrochemical measurement

The electrochemical measurements were performed using a three-electrode system equipped with a ZIVE-SP1 instrument (WonATech Corp., Korea). Nickel foam (NF, geometric area: 1  $\text{cm}^2$ ), Pt wire, and Hg/HgO were employed as the working, counter, and reference electrodes, respectively. To prepare the working electrode, catalysts (5 mg) were added into 225  $\mu\text{L}$  of 2-propanol and 225  $\mu\text{L}$  of DI-water containing 50  $\mu\text{L}$  of 5 wt.% Nafion solution, followed by sonication for 15 min and subsequent stirring overnight. After that, 110  $\mu\text{L}$  of the prepared suspension was quantitatively dropped onto the surface of NF. The loading content of the catalyst on the working electrode is  $\sim 1.1 \text{ mg cm}^{-2}$ . Electrochemical impedance spectroscopy (EIS) was performed in the frequency range of 0.1 Hz to 100 kHz. The Nyquist plots are presented after solution resistance ( $R_s$ ) compensation, where  $R_s$  was determined from the high-frequency intercept of the raw data. This approach allows for a more accurate and direct comparison of the intrinsic charge-transfer behavior ( $R_{ct}$ ) among the catalysts. To convert the measured potential to RHE, the equation  $E_{\text{RHE}} = E_{\text{Hg/HgO}} + 0.0591 \times \text{pH} + 0.098 \text{ V}$  was used. Turnover frequency (TOF) of the catalysts were calculated by normalizing them to the total metal content according to the following equation:

$$\text{TOF} [e/(\text{site} \cdot \text{s})] = \frac{J}{n_{\text{metal}} \times F} = \frac{J \times M_{\text{metal}}}{m_{\text{cat.}} \times w_{\text{metal}} \times F} \quad (1)$$

where  $J$  is the kinetic current density,  $m_{\text{cat.}}$  is the mass loading of the catalyst on the nickel foam,  $w_{\text{metal}}$  is the mass concentration of the metal in the catalyst,  $n_{\text{metal}}$  is the molar amount of the metal in the catalyst, and  $M_{\text{metal}}$  is the atomic weight of the metal.

The mass activity and specific activity of the catalysts were calculated by normalizing them to the total metal content according to the following equation:

$$\text{Mass activity (mA mg}_{\text{metal}}^{-1}) = \frac{J}{m_{\text{cat.}} \times w_{\text{metal}}} \quad (2)$$

$$\text{Specific activity (}\mu\text{A cm}_{\text{ECSA}}^{-2}) = \frac{J}{\text{ECSA}} \quad (3)$$

ECSA was calculated from the  $C_{\text{dl}}$  using  $\text{ECSA} = C_{\text{dl}}/C_s$ , where  $C_s$  was assumed to be  $40 \mu\text{F cm}^{-2}$  (in alkaline media).”

### **AEMWE test**

The electrocatalysts were deposited onto pressed Ni foam substrates via a catalyst-coated substrate (CCS) method. The catalyst loading on the anode was approximately  $20 \text{ mg cm}^{-2}$ , while a commercial Pt/C (40 wt%, TANAKA) catalyst with a loading of  $1 \text{ mg cm}^{-2}$  on carbon cloth was employed as the cathode. Subsequently, the anion exchange membrane water electrolyzer (AEMWE) was assembled into a membrane electrode assembly (MEA) using a Piperion A20 membrane ( $20 \mu\text{m}$  thickness). The polarization curves were recorded at a scan rate of  $1 \text{ mV s}^{-1}$  under continuous  $1.0 \text{ M KOH}$  flow at a rate of  $100 \text{ mL min}^{-1}$ . The geometric surface areas of both anode and cathode were  $4 \text{ cm}^2$ . Durability was further evaluated by chronopotentiometry at a constant current density of  $0.5 \text{ A cm}^{-2}$ .

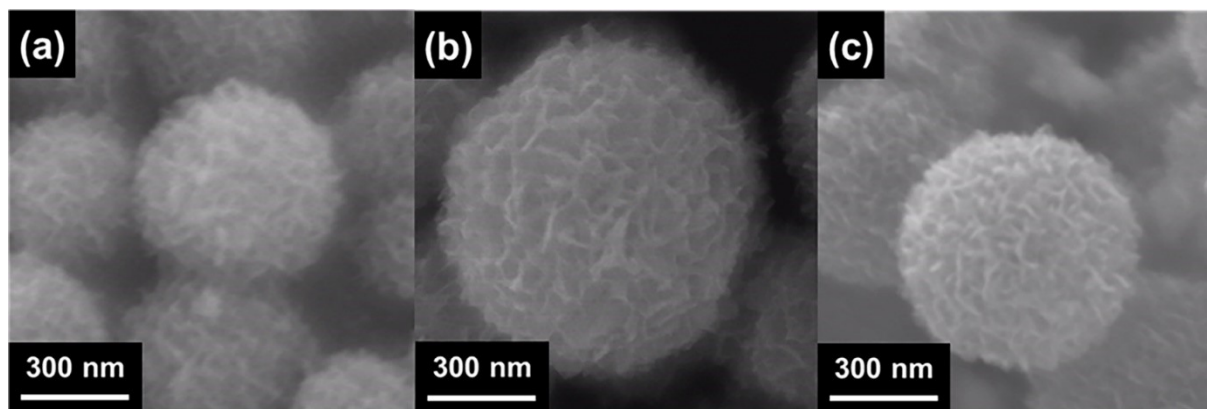

**Fig. S1** SEM images of (a) Mo/PDA, (b) Ni-Mo/PDA, (c) NiO-Mo<sub>x</sub>C/NC.

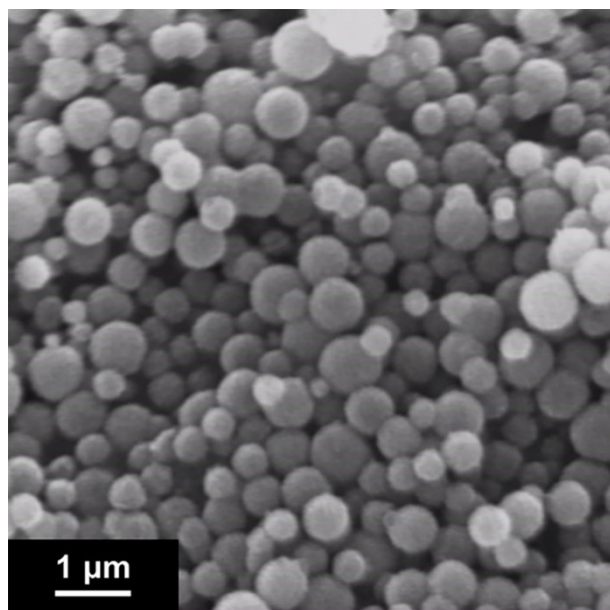

**Fig. S2** Low-magnification SEM image of FeOOH-NiO@Mo<sub>x</sub>C/NC.

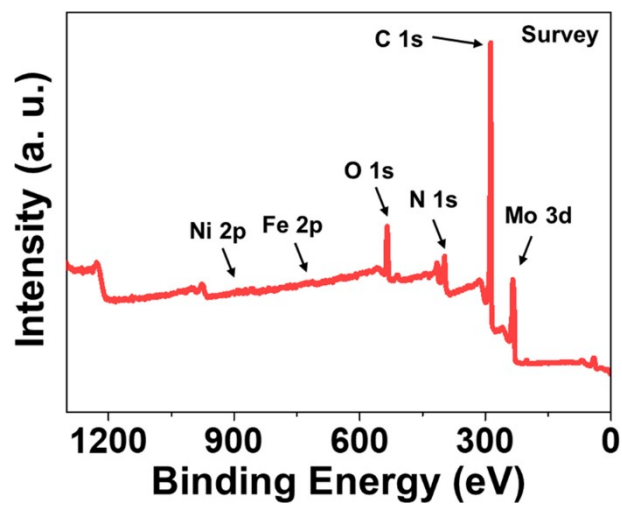

**Fig. S3** Survey XPS spectra of FeOOH-NiO@Mo<sub>x</sub>C/NC.

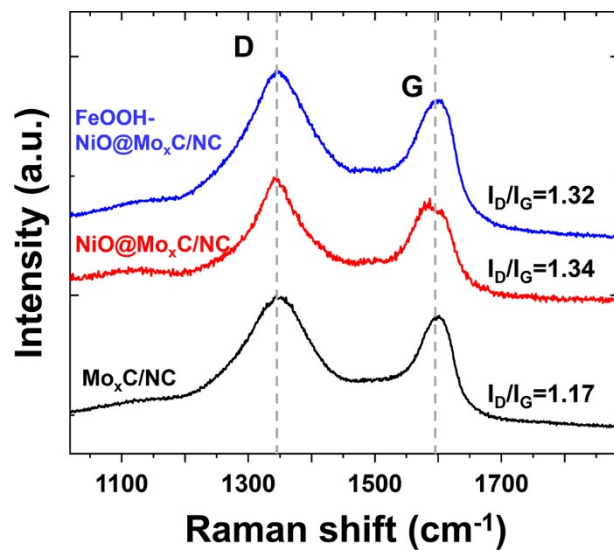

**Fig. S4** Raman spectra of FeOOH-NiO@Mo<sub>x</sub>C/NC, NiO@Mo<sub>x</sub>C/NC, and Mo<sub>x</sub>C/NC in the D- and G-band regions. The intensity ratio ( $I_D/I_G$ ) serves as an indicator of structural disorder.

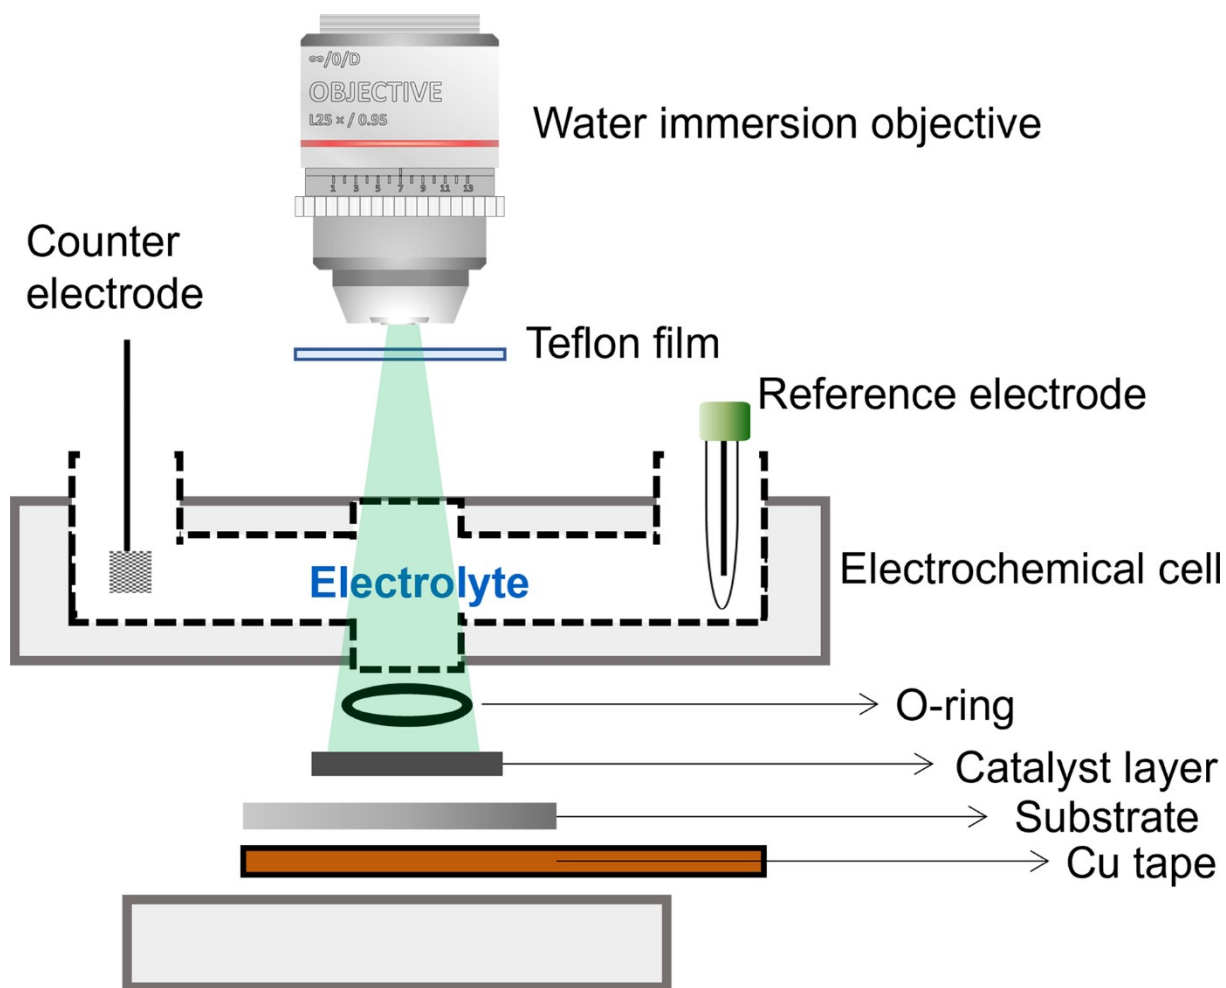

**Fig. S5** Schematic illustration of the operando Raman spectroscopic setup used for electrochemical measurements.

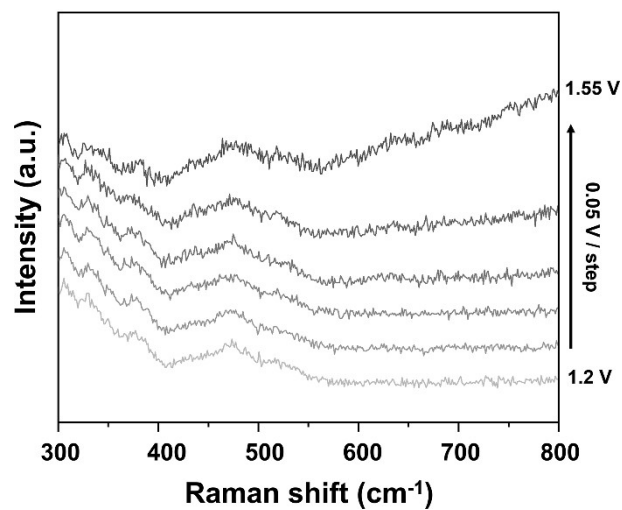

**Fig. S6** Potential-dependent operando Raman spectra of Mo<sub>x</sub>C/NC obtained in the potential range of 1.20–1.45 V (vs. RHE) with 0.05 V step intervals.

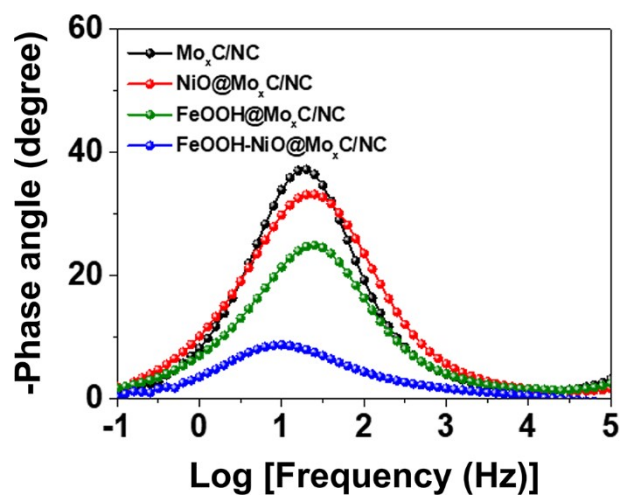

**Fig. S7** The Bode plots obtained at 1.60 V (vs. RHE).

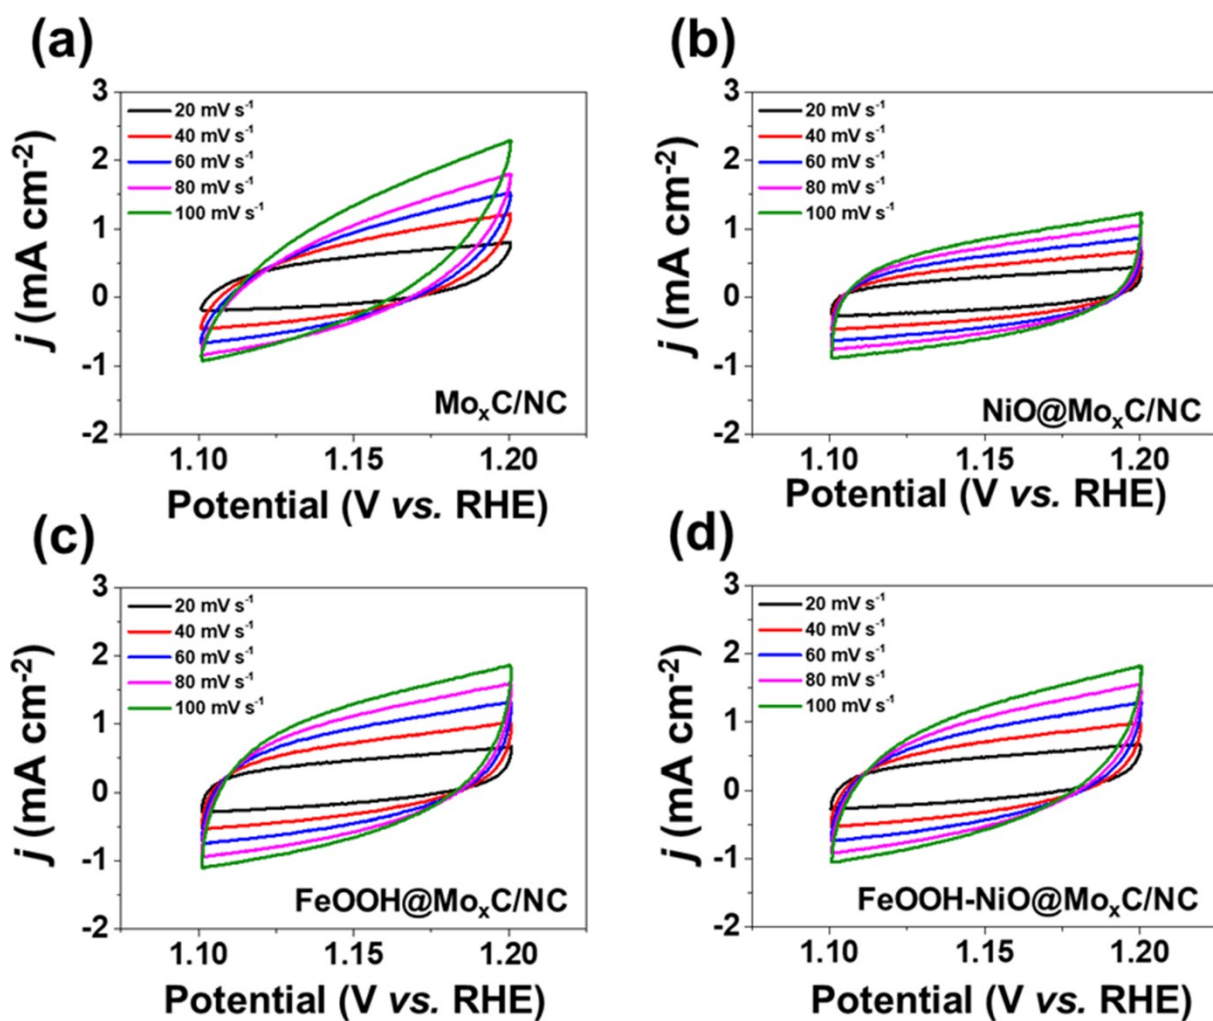

Fig. S8 (a-d) Cyclic voltammety curves of different samples at different scan rates under potential from 1.1 to 1.2 V (vs. RHE).

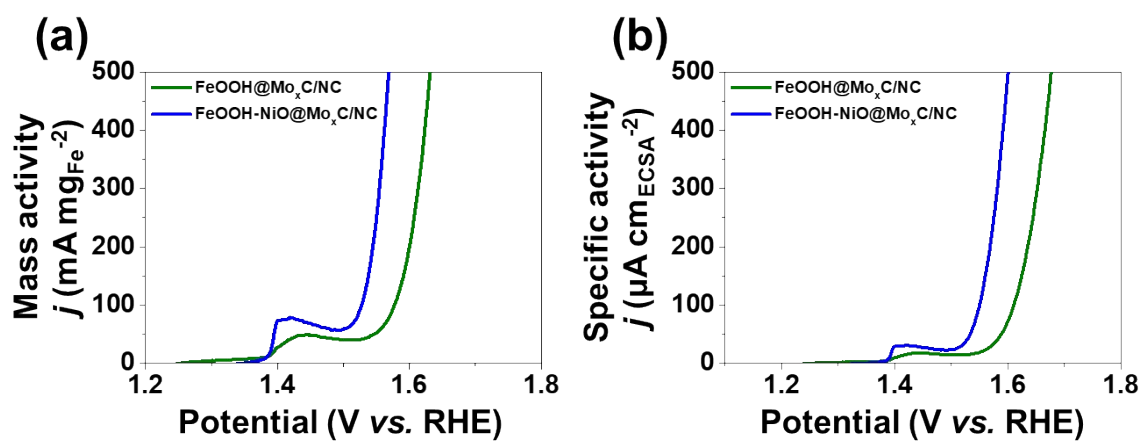

**Fig. S9.** (a) LSV curves for OER showing mass activity normalized to the Fe content based on ICP-OES analysis in 1 M KOH. (b) LSV curves for OER showing specific activity normalized to the ECSA.

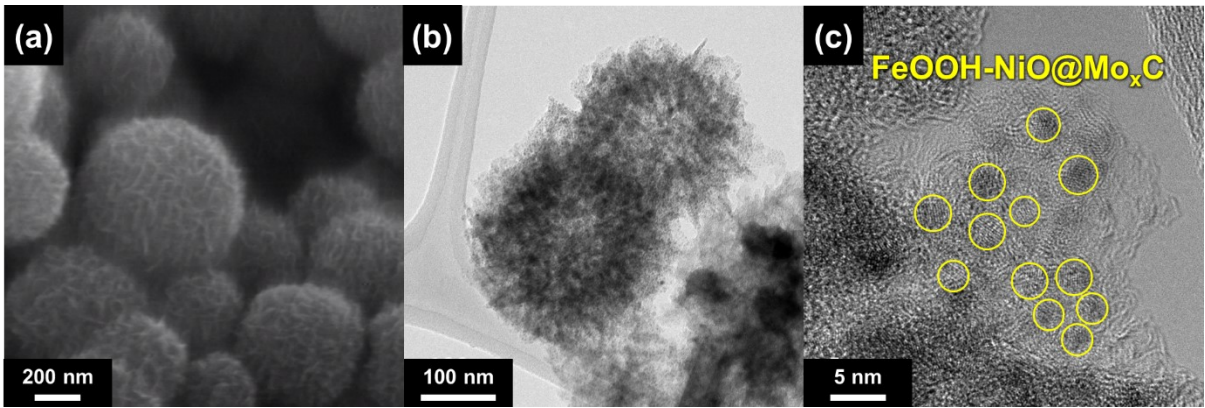

**Fig. S10.** (a) SEM image and (b, c) HRTEM images of FeOOH-NiO@Mo<sub>x</sub>C/NC after ADT.

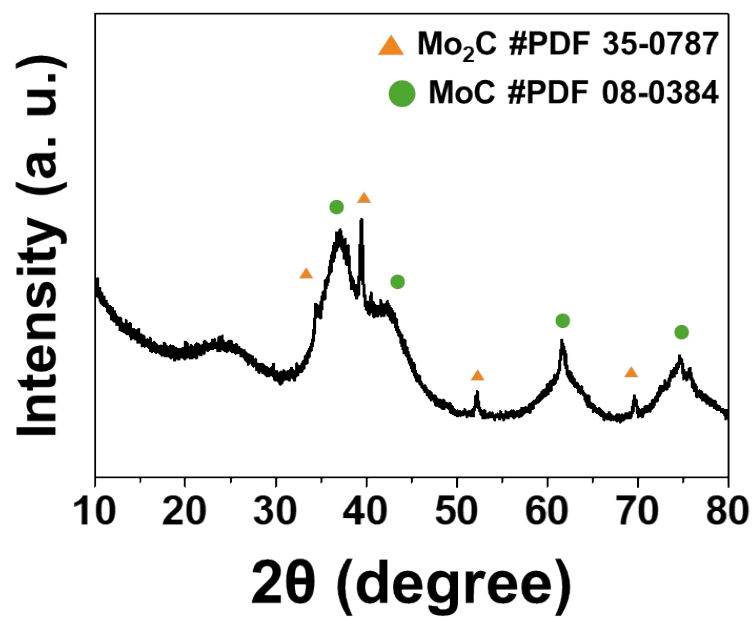

**Fig. S11.** XRD patterns of FeOOH-NiO@Mo<sub>x</sub>C/NC after ADT.

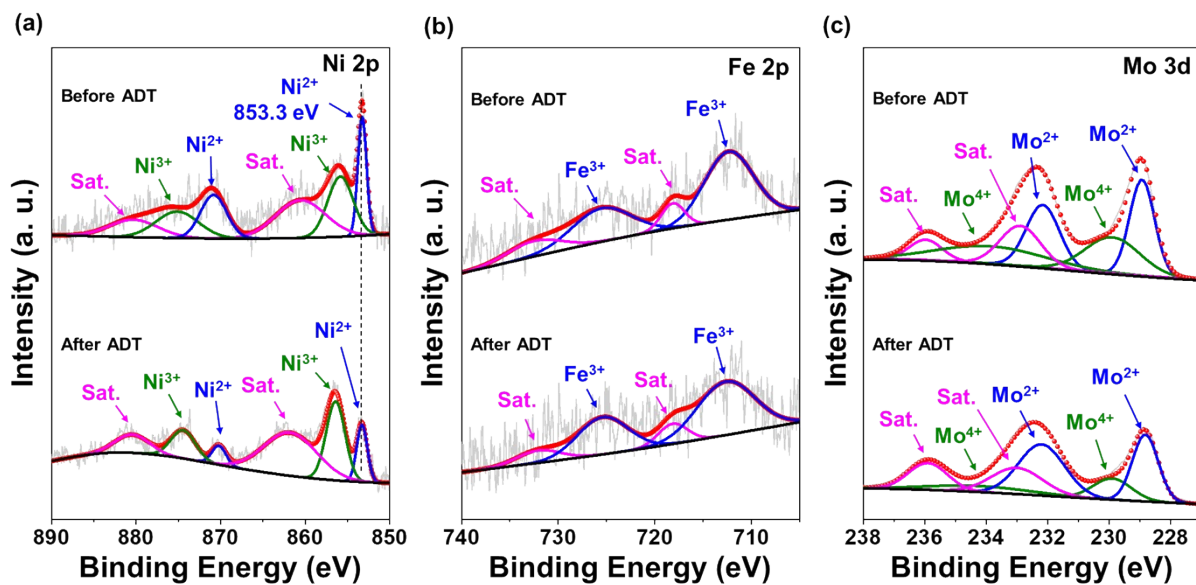

**Fig. S12.** Comparison of XPS spectra of (a) Fe 2p, (b) Ni 2p, and (c) Mo 3d for FeOOH-NiO@Mo<sub>x</sub>C/NC before and after ADT.

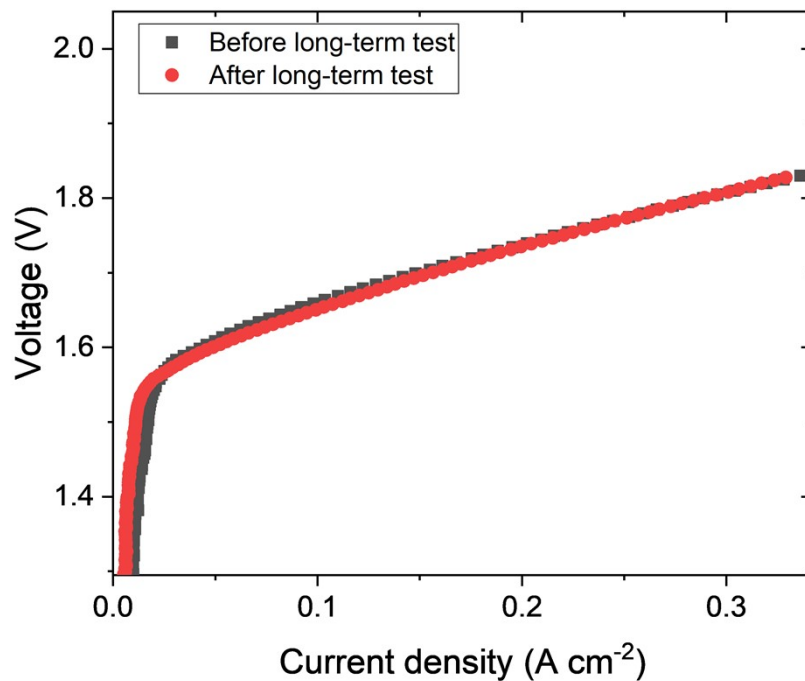

**Fig. S13.** Single-cell polarization curves of the AEMWE employing FeOOH-NiO@Mo<sub>x</sub>C/NC as the anode, recorded before and after the 300 h durability test at 500 mA cm<sup>-2</sup>.

**Table S1.** ICP-OES result of FeOOH-NiO@Mo<sub>x</sub>C/NC.

| <b>Sample</b>                       | <b>Element</b> | <b>Concentration<br/>(mg/kg)</b> | <b>Molar ratio</b> |
|-------------------------------------|----------------|----------------------------------|--------------------|
| <b>FeOOH-NiO@Mo<sub>x</sub>C/NC</b> | Mo             | 479,000                          | 1                  |
|                                     | Ni             | 25,000                           | 0.085              |
|                                     | Fe             | 6,800                            | 0.024              |

**Table S2.** O 1s XPS spectra of FeOOH-NiO@Mo<sub>x</sub>C/NC, NiO@Mo<sub>x</sub>C/NC, and Mo<sub>x</sub>C/NC. The table shows the deconvoluted peak area ratios corresponding to M-OH, M-O, and adsorbed H<sub>2</sub>O species.

|                                     | <b>M-OH ratio (%)</b> | <b>M-O ratio (%)</b> | <b>Absorbed H<sub>2</sub>O ratio (%)</b> | <b>Total (%)</b> |
|-------------------------------------|-----------------------|----------------------|------------------------------------------|------------------|
| <b>FeOOH-NiO@Mo<sub>x</sub>C/NC</b> | 31.7                  | 32.9                 | 35.4                                     | 100              |
| <b>NiO@Mo<sub>x</sub>C/NC</b>       | 12.3                  | 56.5                 | 31.1                                     | 100              |
| <b>Mo<sub>x</sub>C/NC</b>           | 6.2                   | 34.1                 | 59.7                                     | 100              |

**Table S3.** Electrochemical performance comparison of the reported catalysts, including overpotential at a current density of 100 mA cm<sup>-2</sup>, Tafel slope, and stability.

| Catalysts                                             | Electrolyte    | Overpotential<br>at 100 mA<br>cm <sup>-2</sup> (mV) | Tafel slope<br>(mV dec <sup>-1</sup> ) | Stability                                 | Ref.             |
|-------------------------------------------------------|----------------|-----------------------------------------------------|----------------------------------------|-------------------------------------------|------------------|
| <b>FeOOH-NiO<br/>@Mo<sub>x</sub>C/NC</b>              | <b>1 M KOH</b> | <b>372</b>                                          | <b>77.8</b>                            | <b>80 h<br/>at 100 mA cm<sup>-2</sup></b> | <b>This work</b> |
| FeNi <sub>3</sub> N-NPs                               | 1 M KOH        | 386                                                 | 42                                     | 9 h<br>at 10 mA cm <sup>-2</sup>          | [S1]             |
| NF/Co <sub>3</sub> O <sub>4</sub> -Ni                 | 1 M KOH        | 390                                                 | 59.5                                   | 12 h<br>at 70 mA cm <sup>-2</sup>         | [S2]             |
| Ni/Fe <sub>3</sub> O <sub>4</sub>                     | 1 M KOH        | 393                                                 | 70                                     | 11 h                                      | [S3]             |
| FeNi-LDH<br>Ss/Ni                                     | 1 M KOH        | 409                                                 | 85.7                                   | 12 h<br>at 1.52 V (vs.<br>RHE)            | [S4]             |
| P-Ni <sub>0.5</sub> Fe <sub>0.5</sub> Se <sub>2</sub> | 1 M KOH        | 428                                                 | 73                                     | 12 h<br>at 10 mA cm <sup>-2</sup>         | [S5]             |
| RuO <sub>2</sub>                                      | 1 M KOH        | 436                                                 | 120.1                                  | -                                         | This work        |

## Reference

1. X. Jia, Y. Zhao, G. Chen, L. Shang, R. Shi, X. Kang, G. I. N. Waterhouse, L.Z. Wu, C.H. Tung and T. Zhang, *Advanced Energy Materials*, 2016, **6**, 1502585.
2. L. Zeng, K. Zhou, L. Yang, G. Du, L. Liu and W. Zhou, *ACS Applied Energy Materials*, 2018, **1**, 6279-6287.
3. C. He, X. Kong, M. Jiang and X. Lei, *Materials Letters*, 2018, **222**, 138-141.
4. P. Xu, J. Li, J. Luo, L. Wei, D. Zhang, D. Zhou, W. Xu and D. Yuan, *Sci. Rep.*, 2018, **8**, 9425.
5. L. Lv, Z. Li, Y. Ruan, Y. Chang, X. Ao, J.-G. Li, Z. Yang and C. Wang, *Electrochim. Acta*, 2018, **286**, 172-178.
6. K. Fan, H. Chen, Y. Ji, H. Huang, P. M. Claesson, Q. Daniel, B. Philippe, H. Rensmo, F. Li, Y. Luo and L. Sun, *Nat. Commun.*, 2016, **7**, 11981.
7. F. Dionigi, J. Zhu, Z. Zeng, T. Merzdorf, H. Sarodnik, M. Gliech, L. Pan, W.-X. Li, J. Greeley and P. Strasser, *Angew. Chem.*, 2021, **60**, 14446-14457.
8. L. Ciambriello, I. Alessandri, L. Gavioli and I. Vassalini, *ChemCatChem*, 2024, **16**, e202400286.
9. A.-L. Wang, Y.-T. Dong, M. Li, C. Liang and G.-R. Li, *ACS Applied Materials & Interfaces*, 2017, **9**, 34954-34960.
10. X. Yu, M. Zhang, Y. Tong, C. Li and G. Shi, *Advanced Energy Materials*, 2018, **8**, 1800403.
11. S. Zhao, M. Li, M. Han, D. Xu, J. Yang, Y. Lin, N.-E. Shi, Y. Lu, R. Yang, B. Liu, Z. Dai and J. Bao, *Adv. Funct. Mater.*, 2018, **28**, 1706018.
